# Supplementary material for: The Use of Endo-Cellulase and Endo-Xylanase for the Extraction of Apple Pectins as Factors Modifying Their Anticancer Properties and Affecting Their Synergy with the Active Form of Irinotecan
Source: MDPI journal article supplement (doi:10.3390/ph15060732), 2022-06-09
Supplement: s1 [file s1]

# Supplementary figures:

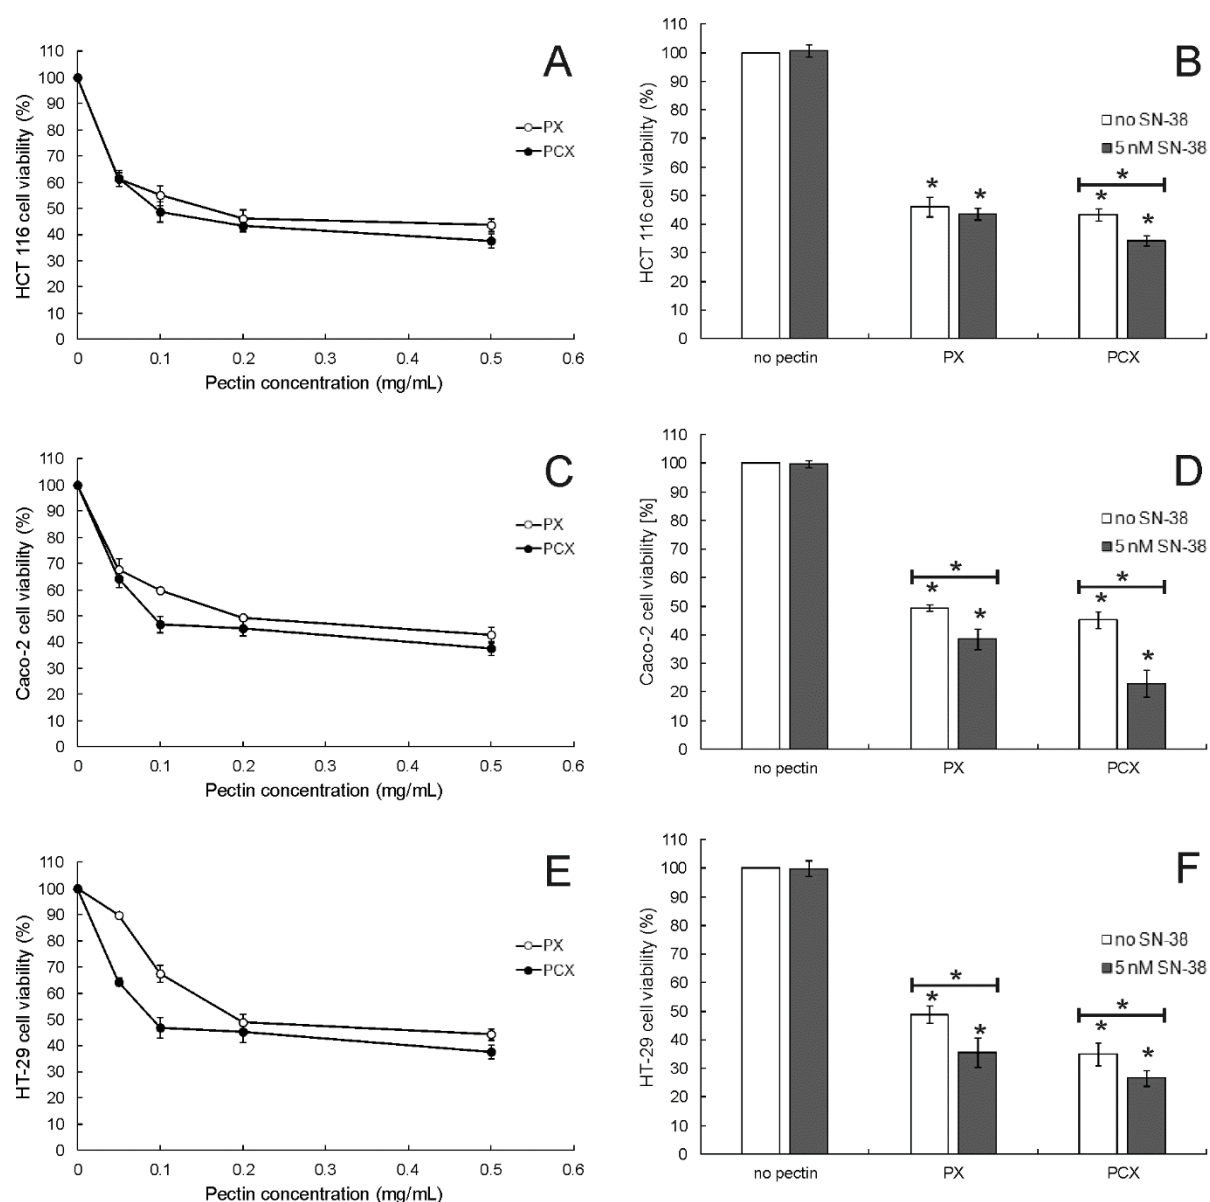

**Figure S1.** SRB cytotoxicity assay of pectins in HCT 116 (A), Caco-2 (C), HT-29 cells (E), and 0.2 mg/ml pectins in combination with SN-38 (B, D and F for HCT 116, Caco-2, and HT-29 cells, respectively). Incubation time was 48 h. The means of three experiments  $\pm$  SD are presented (\*  $p < 0.05$ ). Statistical significance was checked between the studied probes and controls (no pectin) and between probes containing only pectin and pectin combined with SN-38.

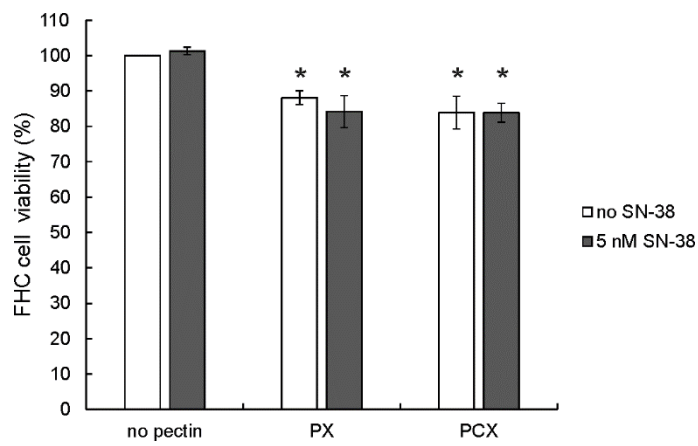

**Figure S2.** MTT cytotoxicity assay of pectins at 0.2 mg/mL in FHC cells. Incubation time was 48 h. The means of three experiments  $\pm$  SD are presented (\*  $p < 0.05$ ). Statistical significance was checked between the studied probes and controls (no pectin) and between probes containing only pectin and pectin combined with SN-38.

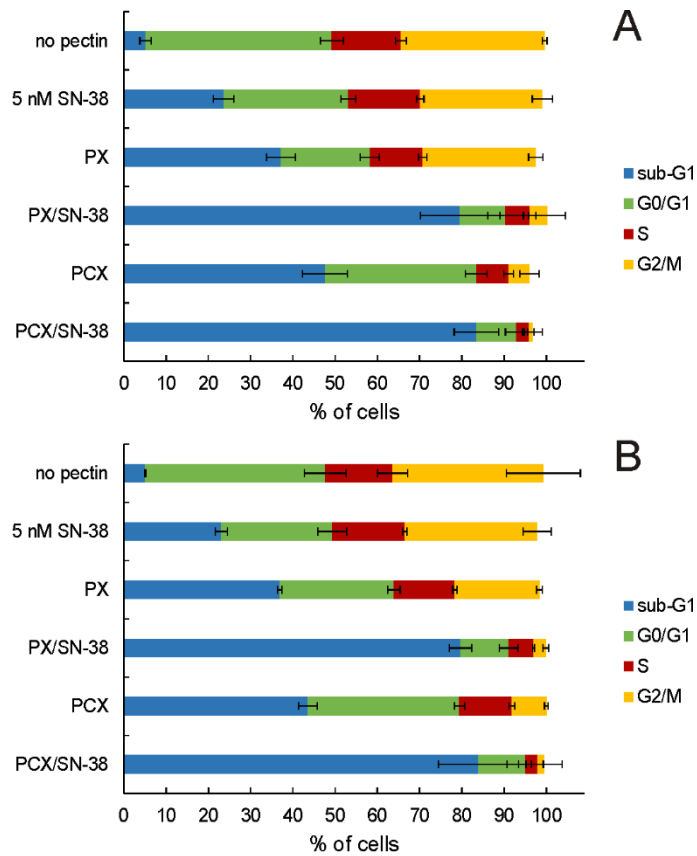

**Figure S3.** Cell cycle-dependent DNA content in **HCT 116 (A)** and **Caco-2 (B)**, cells treated with 0.2 mg/ml of pectins and/or SN-38 for 48 hours. SubG1 population – dead cells, G0/G1 – mononuclear cells, S – DNA replication, G2/M – mitosis. The means of three experiments  $\pm$  SD are presented (\*  $p < 0.05$ ).

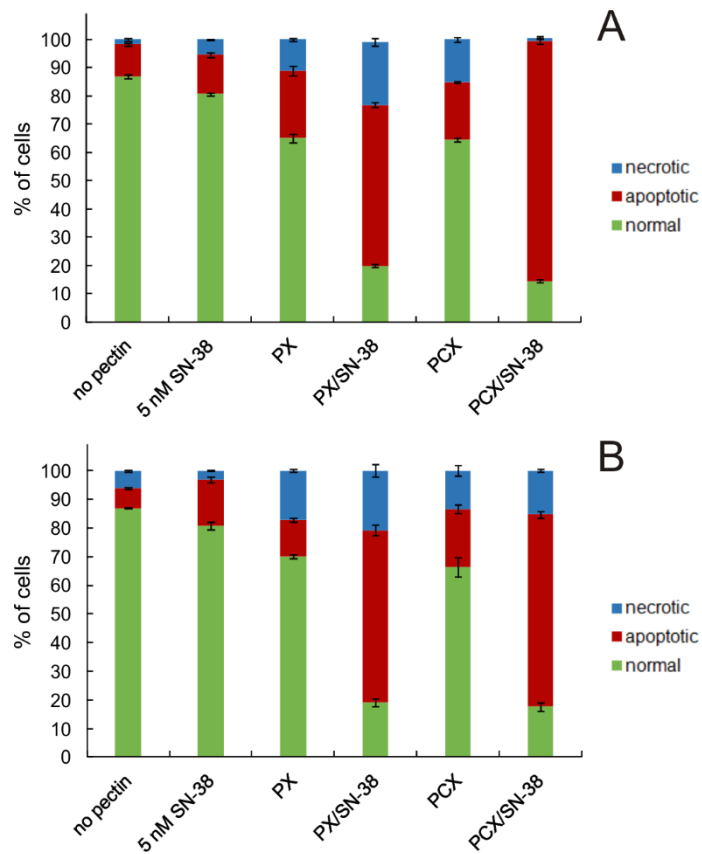

**Figure S4.** The proportion of normal, apoptotic, and necrotic cell populations as recorded by Annexin V apoptosis assay in HCT 116 (A) and Caco-2 (B) cells treated with pectins (0.2 mg/ml) and/or SN-38 for 48 hours. The means of three experiments  $\pm$  SD are presented (\*  $p < 0.05$ ).

Cells were recognized as viable (Annexin-V and PI negative), apoptotic (Annexin-V positive and PI negative), and necrotic (Annexin-V and PI-positive) based on the measurement of cell-associated fluorescence of FITC-Annexin-V conjugate and PI.

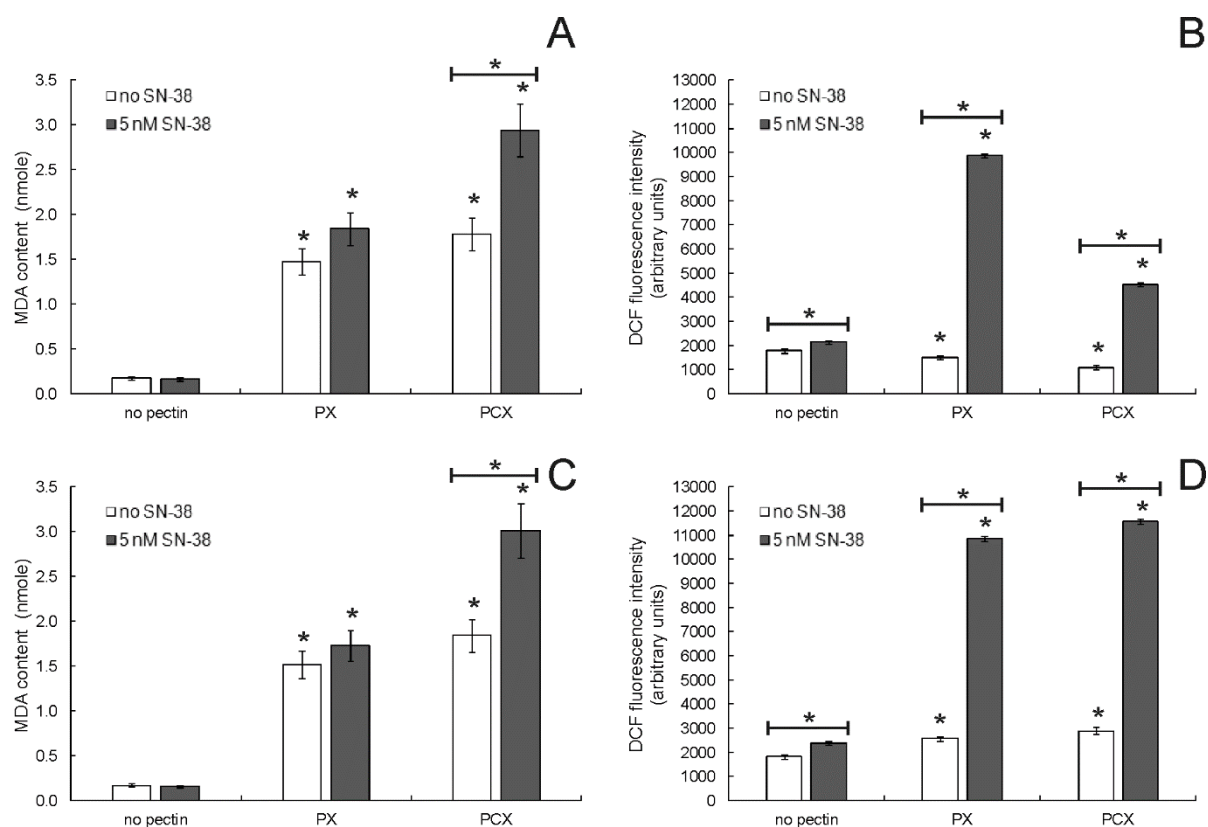

**Figure S5.** Lipid peroxidation (A and C) and ROS level (B and D) in HCT 116 (A and B) and Caco-2 (C and D) cells treated with 0.2 mg/ml pectins and/or 5 nM SN-38 for 48 hours.

The means of three experiments  $\pm$  SD are presented (\*  $p < 0.05$ ). Statistical significance was checked between the studied probes and controls (no pectin) as well as between probes containing only pectin and pectin combined with SN-38.

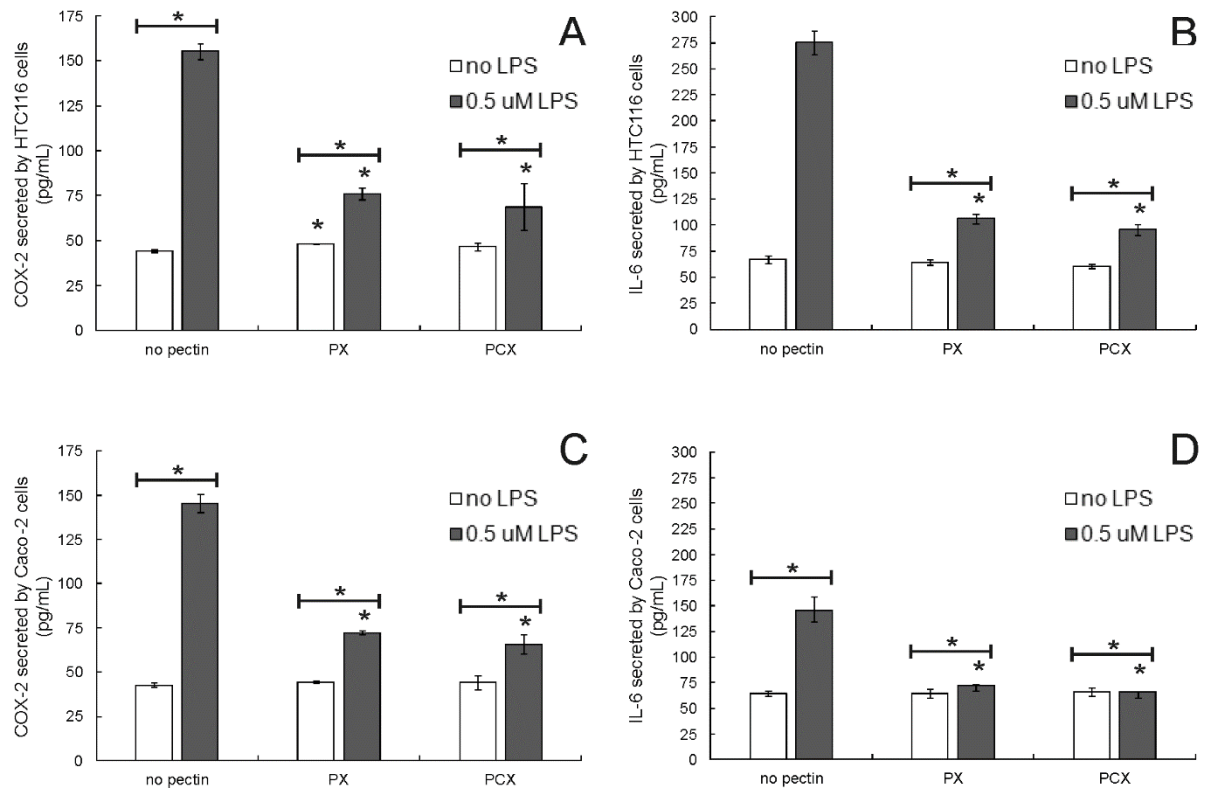

**Figure S6.** Amount of COX-2 (A and C) and IL-6 (B and D) in HCT 116 (A and B) and Caco-2 (C and D) cells treated with 0.2 mg/ml pectins and/or 0.5  $\mu$ M LPS. Cells were pretreated with LPS for 24 hours and then incubated with pectins for 48 hours.

The means of three experiments  $\pm$  SD are presented (\*  $p < 0.05$ ). Statistical significance was checked between the studied probes and controls (no pectin) as well as between probes containing only pectin and pectin combined with LPS.

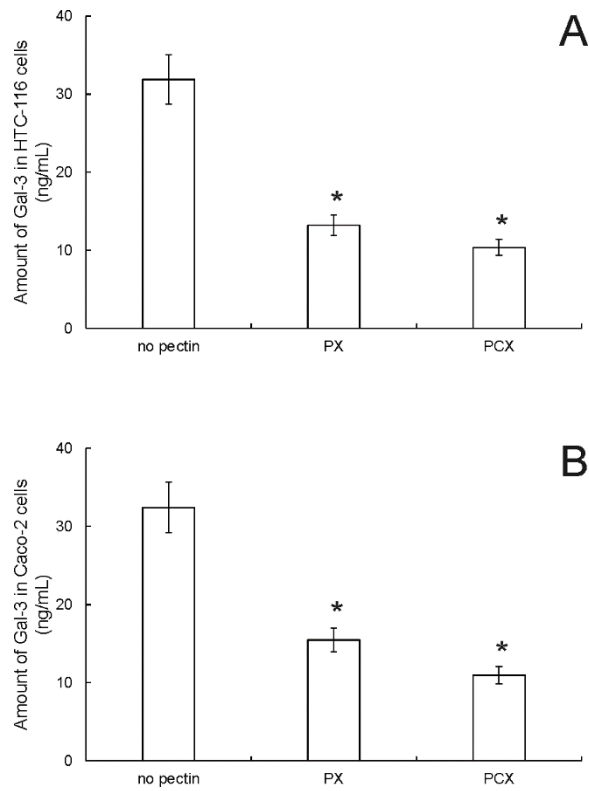

**Figure S7.** Amount of Gal-3 in HCT 116 (A) and Caco-2 (B) cells treated with 0.2 mg/ml pectins for 48 hours. The means of three experiments  $\pm$  SD are presented (\*  $p < 0.05$ ). Statistical significance was checked between the studied probes and controls (no pectin).
